# Supplementary material for: Exploring the feasibility and conduction mechanisms of P-type nitrogen-doped β-Ga2O3 with high hole mobility
Source: Royal Society of Chemistry journal article supplement (doi:10.1039/d1tc05324h), 2022-01-01
Supplement: d1tc05324h1.pdf [file d1tc05324h1.pdf]

**Electronic Supplementary Information**  
**Exploring the feasibility and conduction mechanisms of**  
**P-type nitrogen-doped  $\beta$ -Ga<sub>2</sub>O<sub>3</sub> with high hole mobility**

Congcong Ma <sup>a,b,†</sup>, Zhengyuan Wu <sup>a,b,†</sup>, Zhuoxun Jiang <sup>a</sup>, Ying Chen <sup>a,b</sup>, Wei Ruan <sup>a</sup>, Hao Zhang <sup>a,c,\*</sup>, Heyuan Zhu <sup>a</sup>, Guoqi Zhang <sup>a</sup>, Junyong Kang <sup>d</sup>, Tong-Yi Zhang <sup>e</sup>, Junhao Chu <sup>b</sup> and Zhilai Fang <sup>a,b,\*</sup>

<sup>a</sup> School of Information Science and Technology, and Academy for Engineering and Technology, Fudan University, Shanghai 200433, China

<sup>b</sup> Institute of Optoelectronics, Fudan University, Shanghai 200433, China

<sup>c</sup> Yiwu Research Institute of Fudan University, Chengbei Road, Yiwu City, Zhejiang 322000, China

<sup>d</sup> Collaborative Innovation Center for Optoelectronic Semiconductors and Efficient Devices, Department of Physics, Xiamen University, Xiamen 361005, China

<sup>e</sup> Materials Genome Institute, Shanghai University, 333 Nanchen Road, Shanghai 200444, China

† These authors contributed equally to this work.

Contents

1. Formation energies of phase transition from GaN to  $\beta$ -Ga<sub>2</sub>O<sub>3</sub>
2. Band structure of Ga<sub>48</sub>O<sub>70</sub>N<sub>2</sub>
3. Ultraviolet-photoelectron-spectroscopy (UPS) valence band spectrum of N-doped  $\beta$ -Ga<sub>2</sub>O<sub>3</sub>
4. Formation energies of neutral and charged Ga<sub>48</sub>O<sub>70</sub>N<sub>2</sub>
5. Numerical method and computational details of scattering characteristics
6. Growth and Materials characterization of N-doped  $\beta$ -Ga<sub>2</sub>O<sub>3</sub> films

---

\* Corresponding authors.

*E-mail address:* [zlfang@fudan.edu.cn](mailto:zlfang@fudan.edu.cn), [zhangh@fudan.edu.cn](mailto:zhangh@fudan.edu.cn)

## 1. Formation energies of phase transition from GaN to $\beta$ -Ga<sub>2</sub>O<sub>3</sub>

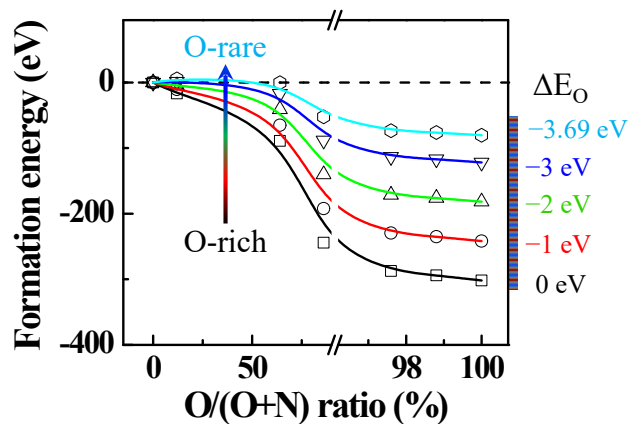

**Fig. S1.** Formation energy versus O/(O+N) ratio from 0 (GaN) to 1 ( $\beta$ -Ga<sub>2</sub>O<sub>3</sub>) under different O ambient conditions.

## 2. Band structure of Ga<sub>48</sub>O<sub>70</sub>N<sub>2</sub>

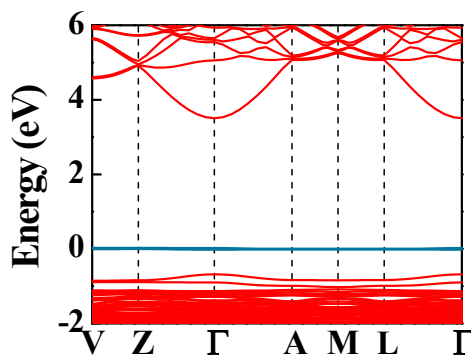

**Fig. S2.** Band structure of Ga<sub>48</sub>O<sub>70</sub>N<sub>2</sub>.

The band structure of Ga<sub>48</sub>O<sub>70</sub>N<sub>2</sub> shows an impurity level (blue line) at 0.56 eV above VBM.

### 3. Ultraviolet-photoelectron-spectroscopy (UPS) valence band spectrum of N-doped $\beta$ - $\text{Ga}_2\text{O}_3$

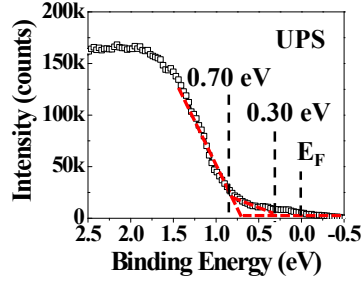

**Fig. S3.** UPS (21.22 eV He I radiation) valence band photoemission spectrum of the valence band edge.

### 4. Formation energies of neutral and charged $\text{Ga}_{48}\text{O}_{70}\text{N}_2$

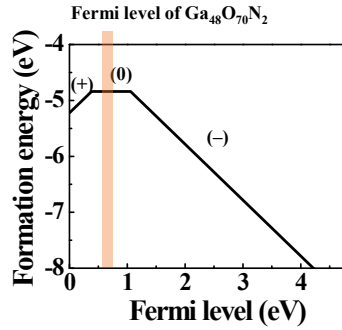

**Fig. S4.** Formation energies of neutral and charged  $\text{Ga}_{48}\text{O}_{70}\text{N}_2$  versus Fermi level.

The relationship between formation energy of neutral  $\text{Ga}_{48}\text{O}_{70}\text{N}_2$  and Fermi level is described by  $E_f[N_0^0(\text{Ga}_{48}\text{O}_{70}\text{N}_2), E_F = 0] = E_{\text{tot}}[N_0^0(\text{Ga}_{48}\text{O}_{70}\text{N}_2)] - E_{\text{tot}}(\text{Ga}_{48}\text{O}_{69}\text{N}_3) + E_N - E_O$ .

The relationship between formation energy of  $\text{Ga}_{48}\text{O}_{70}\text{N}_2^-$  and Fermi level is described by  $E_f[N_0^-(\text{Ga}_{48}\text{O}_{70}\text{N}_2), E_F = 0] = E_{\text{tot}}[N_0^-(\text{Ga}_{48}\text{O}_{70}\text{N}_2)] - E_{\text{tot}}(\text{Ga}_{48}\text{O}_{69}\text{N}_3) + E_N - E_O - (E_{VBM} + E_F + E_{\text{corr}})$ .

The relationship between formation energy of  $\text{Ga}_{48}\text{O}_{70}\text{N}_2^+$  and Fermi level is described by  $E_f[N_0^+(\text{Ga}_{48}\text{O}_{70}\text{N}_2), E_F = 0] = E_{\text{tot}}[N_0^+(\text{Ga}_{48}\text{O}_{70}\text{N}_2)] - E_{\text{tot}}(\text{Ga}_{48}\text{O}_{69}\text{N}_3) + E_N - E_O + (E_{VBM} + E_F$

+  $E_{corr}$ ).

## 5. Numerical method and computational details of scattering characteristics

The hole mobility and scattering characteristics are predicted based on the Boltzmann transport theory using the *Ab initio* Scattering and Transport package. The scattering rate from initial state  $|nk\rangle$  to final state  $|mk+q\rangle$  is defined using Fermi's gold rule as  $\tau_{nk \rightarrow mk+q}^{-1} = \frac{2\pi}{\hbar} |g_{mn}(k,q)|^2 \delta(\varepsilon_{nk} - \varepsilon_{mk+q})$ , where  $\varepsilon_{nk}$  denotes the energy of state  $|nk\rangle$ ,  $\varepsilon_{mk+q}$  the energy of state  $|mk+q\rangle$ ,  $g_{mn}(k,q)$  the coupling matrix element for scattering from state  $|nk\rangle$  to state  $|mk+q\rangle$ ,  $k$  the wave vector,  $n$  and  $m$  the band index. Acoustic deformation potential scattering (ADP), optical phonon scattering (OPP) and ionized impurity scattering (IOI) are addressed. The impact of various scatterings on hole mobility is expressed via the coupling matrix element.

The matrix element of ADP is given by:

$$g_{nm}^{ADP} = \sqrt{K_B T} \sum_{G \neq -q} \left[ \frac{D_{nk} \cdot \tilde{S}_l}{C_l \sqrt{\rho_m}} + \frac{D_{nk} \cdot \tilde{S}_{t_1}}{C_{t_1} \sqrt{\rho_m}} + \frac{D_{nk} \cdot \tilde{S}_{t_2}}{C_{t_2} \sqrt{\rho_m}} \right] \langle mk+q | e^{i(q+G) \cdot r} | nk \rangle$$

, where  $D_{nk}$

denotes the deformation potential tensor,  $\tilde{S}$  the unit strain associated with an acoustic mode,  $\rho_m$  the density of materials,  $c$  the wave velocity, and subscripts  $l$ ,  $t_1$  and  $t_2$  indicate properties

belonging to longitudinal and transverse modes. The deformation potential tensor  $D_{nk}$  is obtained by  $D_{nk} + V_{nk} \otimes V_{nk}$ , where  $D_{nk}$  denotes the second rank deformation potential tensor,

$V_{nk}$  the group velocity. The unit strain associated with an acoustic mode ( $\tilde{S}$ ) is obtained by  $\hat{q} \otimes \hat{u}$ , where  $\hat{u}$  denotes the unit vector of phonon polarization. The matrix element of OPP is

described by:

$$g_{nm}^{OPP} = \left[ \frac{\hbar \omega_{op}}{2} \right]^{\frac{1}{2}} \sum_{G \neq -q} \left( \frac{1}{\hat{n} \cdot \varepsilon_{\infty} \cdot \hat{n}} - \frac{1}{\hat{n} \cdot \varepsilon_s \cdot \hat{n}} \right) \frac{\langle mk+q | e^{i(q+G) \cdot r} | nk \rangle}{|q+G|}$$

, where

$\omega_{op}$  denotes the optical phonon frequency,  $\hat{n} = (q+G)/|q+G|$  a unit vector in the direction of

scattering,  $\epsilon_s$  the static dielectric tensor,  $\epsilon_\infty$  the high-frequency dielectric tensor. The matrix

element of IOI is given by: 
$$g_{nm}^{IOI} = \sum_{G \neq -q} \frac{n_{ii}^{1/2} Z e}{2 \hat{n} \cdot \epsilon_s \cdot \hat{n}} \frac{\langle mk + q | e^{i(q+G) \cdot r} | nk \rangle}{|q + G|^2 + \beta^2},$$
 where  $Z$  denotes the charge state of the impurity center,  $n_{ii} = C_{self} \times (p - n)/Z$  the concentration of ionized impurities,  $C_{self}$  the amount of charge compensation, and  $\beta$  the inverse screening length.

The  $\beta^2$  is obtained by  $\frac{e^2}{\epsilon_s K T} \int \frac{D(\epsilon) f(1-f)}{V} d\epsilon$ , where  $V$  denotes the unit cell volume,  $D(\epsilon)$  the density of states, and  $f$  Fermi-Dirac distribution.

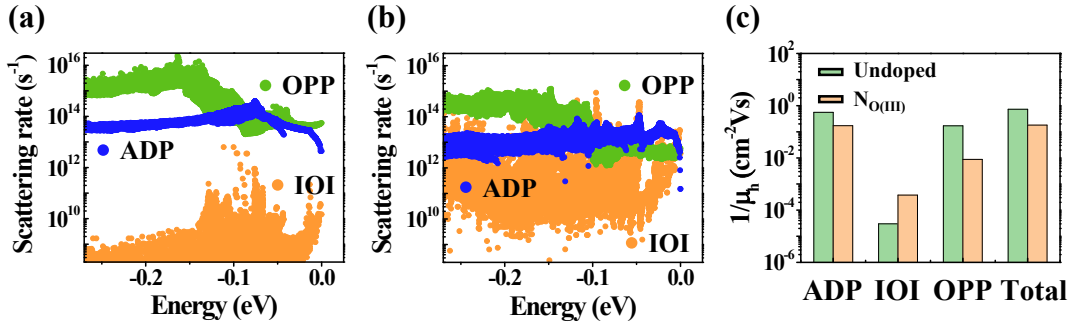

**Fig. S5.** Scattering rates of ADP, IOI, and OPP for (a) undoped  $\beta$ -Ga<sub>2</sub>O<sub>3</sub> and (b)  $\beta$ -Ga<sub>2</sub>O<sub>3</sub>:N<sub>O(III)</sub> obtained by the spin-polarized calculations. (c) Calculated  $1/\mu_{ADP}$ ,  $1/\mu_{IOI}$ ,  $1/\mu_{OPP}$ , and  $1/\mu_{Total}$  of undoped  $\beta$ -Ga<sub>2</sub>O<sub>3</sub> and  $\beta$ -Ga<sub>2</sub>O<sub>3</sub>:N<sub>O(III)</sub>, where  $\mu_{Total}$  is the total hole mobility,  $\mu_{ADP}$ ,  $\mu_{IOI}$ , and  $\mu_{OPP}$  the hole mobilities related to the ADP, IOI and OPP, respectively.

| Material                                                      | $p$<br>( $\text{cm}^{-3}$ ) | Temperature<br>(K) | ADP<br>( $\text{s}^{-1}$ ) | IOI<br>( $\text{s}^{-1}$ ) | OPP<br>( $\text{s}^{-1}$ ) |
|---------------------------------------------------------------|-----------------------------|--------------------|----------------------------|----------------------------|----------------------------|
| Undoped<br>$\beta\text{-Ga}_2\text{O}_3$                      | $10^{10}$                   | 300                | $4.4 \times 10^{12}$       | $1.4 \times 10^{10}$       | $5.5 \times 10^{13}$       |
| $\beta\text{-Ga}_2\text{O}_3$ :<br>$\text{N}_{\text{O(III)}}$ |                             |                    |                            |                            |                            |
| Nonspin                                                       | $10^{15}$                   | 300                | $4.3 \times 10^{10}$       | $4.8 \times 10^{13}$       | $3.3 \times 10^{13}$       |
| Spin<br>polarization                                          | $10^{15}$                   | 300                | $1.5 \times 10^{11}$       | $3.6 \times 10^{12}$       | $5.8 \times 10^{12}$       |

**Table S1.** Summary of room-temperature scattering rates of ADP, IOI, and OPP at VBM for undoped  $\beta\text{-Ga}_2\text{O}_3$  and  $\beta\text{-Ga}_2\text{O}_3\text{:N}_{\text{O(III)}}$  obtained by the nonspin and spin-polarized calculations.

| Material                                                      | $p$<br>( $\text{cm}^{-3}$ ) | Temperature<br>(K) | $\mu_{\text{Total}}$<br>( $\text{cm}^2\text{V}^{-1}\text{s}^{-1}$ ) | $\mu_{\text{ADP}}$<br>( $\text{cm}^2\text{V}^{-1}\text{s}^{-1}$ ) | $\mu_{\text{IOI}}$<br>( $\text{cm}^2\text{V}^{-1}\text{s}^{-1}$ ) | $\mu_{\text{OPP}}$<br>( $\text{cm}^2\text{V}^{-1}\text{s}^{-1}$ ) |
|---------------------------------------------------------------|-----------------------------|--------------------|---------------------------------------------------------------------|-------------------------------------------------------------------|-------------------------------------------------------------------|-------------------------------------------------------------------|
| Undoped<br>$\beta\text{-Ga}_2\text{O}_3$                      | $10^{10}$                   | 300                | 1.3                                                                 | 1.8                                                               | 33300                                                             | 5.8                                                               |
| $\beta\text{-Ga}_2\text{O}_3$ :<br>$\text{N}_{\text{O(III)}}$ |                             |                    |                                                                     |                                                                   |                                                                   |                                                                   |
| Nonspin                                                       | $10^{15}$                   | 300                | 8.8                                                                 | 300.0                                                             | 354.3                                                             | 9.0                                                               |
| Spin<br>polarization                                          | $10^{15}$                   | 300                | 5.5                                                                 | 5.8                                                               | 2643.2                                                            | 114.0                                                             |

**Table S2.** Summary of room-temperature hole mobilities  $\mu_{\text{Total}}$ ,  $\mu_{\text{ADP}}$ ,  $\mu_{\text{IOI}}$ , and  $\mu_{\text{OPP}}$  for undoped  $\beta\text{-Ga}_2\text{O}_3$  and  $\beta\text{-Ga}_2\text{O}_3\text{:N}_{\text{O(III)}}$  obtained by the nonspin and spin-polarized calculations.

## 6. Growth and Materials characterization of N-doped $\beta\text{-Ga}_2\text{O}_3$ films

### *Growth of N-doped $\beta\text{-Ga}_2\text{O}_3$ films*

The  $\beta$ -Ga<sub>2</sub>O<sub>3</sub> films were prepared by thermal oxidation of GaN/sapphire substrates at 1000–1100 °C using a modified chemical vapor deposition system. The GaN surface was cleaned by acetone, ethanol, and deionized water for 10 mins in turn. After then the cleaned GaN films were placed in a quartz boat and inserted in a quartz tube furnace, followed by annealing of the GaN films under oxygen ambient. During the thermal oxidation process, the oxygen pressure, high-purity Ar gas purge, and pumping rate are well controlled. The growth rate and crystalline quality were maintained by well control of oxygen pressure and Ar gas purge for efficient N doping within the  $\beta$ -Ga<sub>2</sub>O<sub>3</sub> films.

#### *Materials characterization*

Ultraviolet photoelectron spectroscopy (UPS, 21.22 eV He I radiation) was used to investigate the VB photoemission. The Fermi level ( $E_F$ ) was calibrated by referring the Au energy. Temperature-dependent Van der Pauw Hall effect measurements were performed to analyze the p-type properties of the  $\beta$ -Ga<sub>2</sub>O<sub>3</sub> films.
